# Supplementary material for: Structure-specific antitumor effects and potential gut microbiota-involved mechanisms of ginseng polysaccharides on B16F10 melanoma-bearing mice
Source: Royal Society of Chemistry journal article supplement (doi:10.1039/d2fo03383f), 2022-12-20
Supplement: d2fo03383f1.pdf [file d2fo03383f1.pdf]

## Supplementary Materials

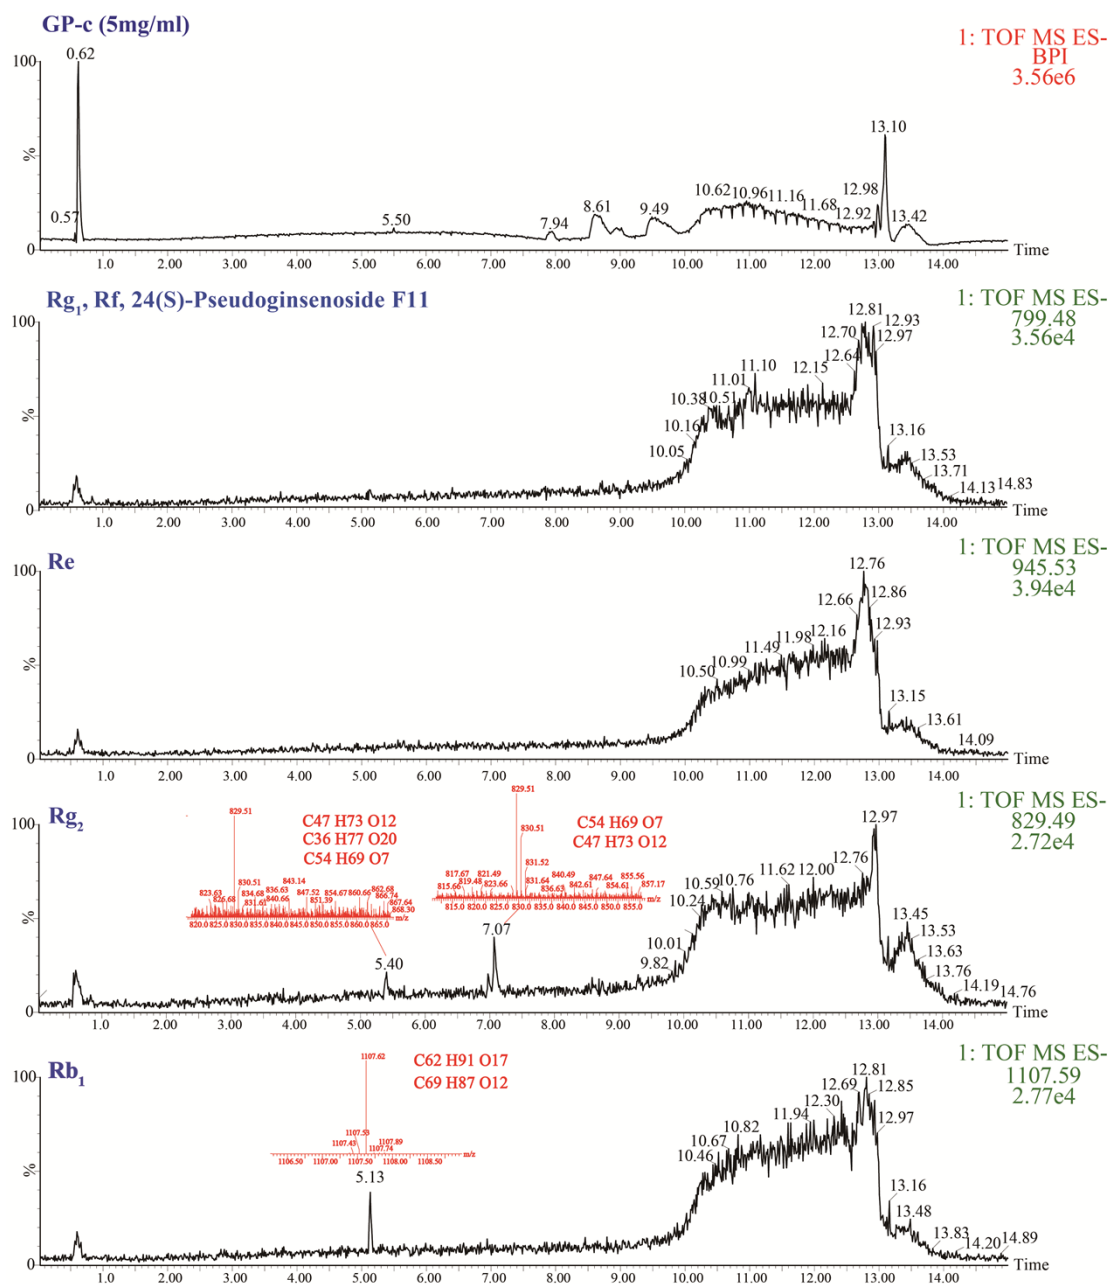

**Fig. S1.** The BPI chromatograms of GP-c, and extracted ion chromatograms for ginsenoside Rg<sub>1</sub>, Rf, 24(S)-Pseudoginsenoside F11, Re, Rg<sub>2</sub>, Rb<sub>1</sub>, Ro, Rc, Rb<sub>2</sub>, Rb<sub>3</sub>, Rd, 20(R)-Rg<sub>3</sub> and Rh<sub>2</sub>.

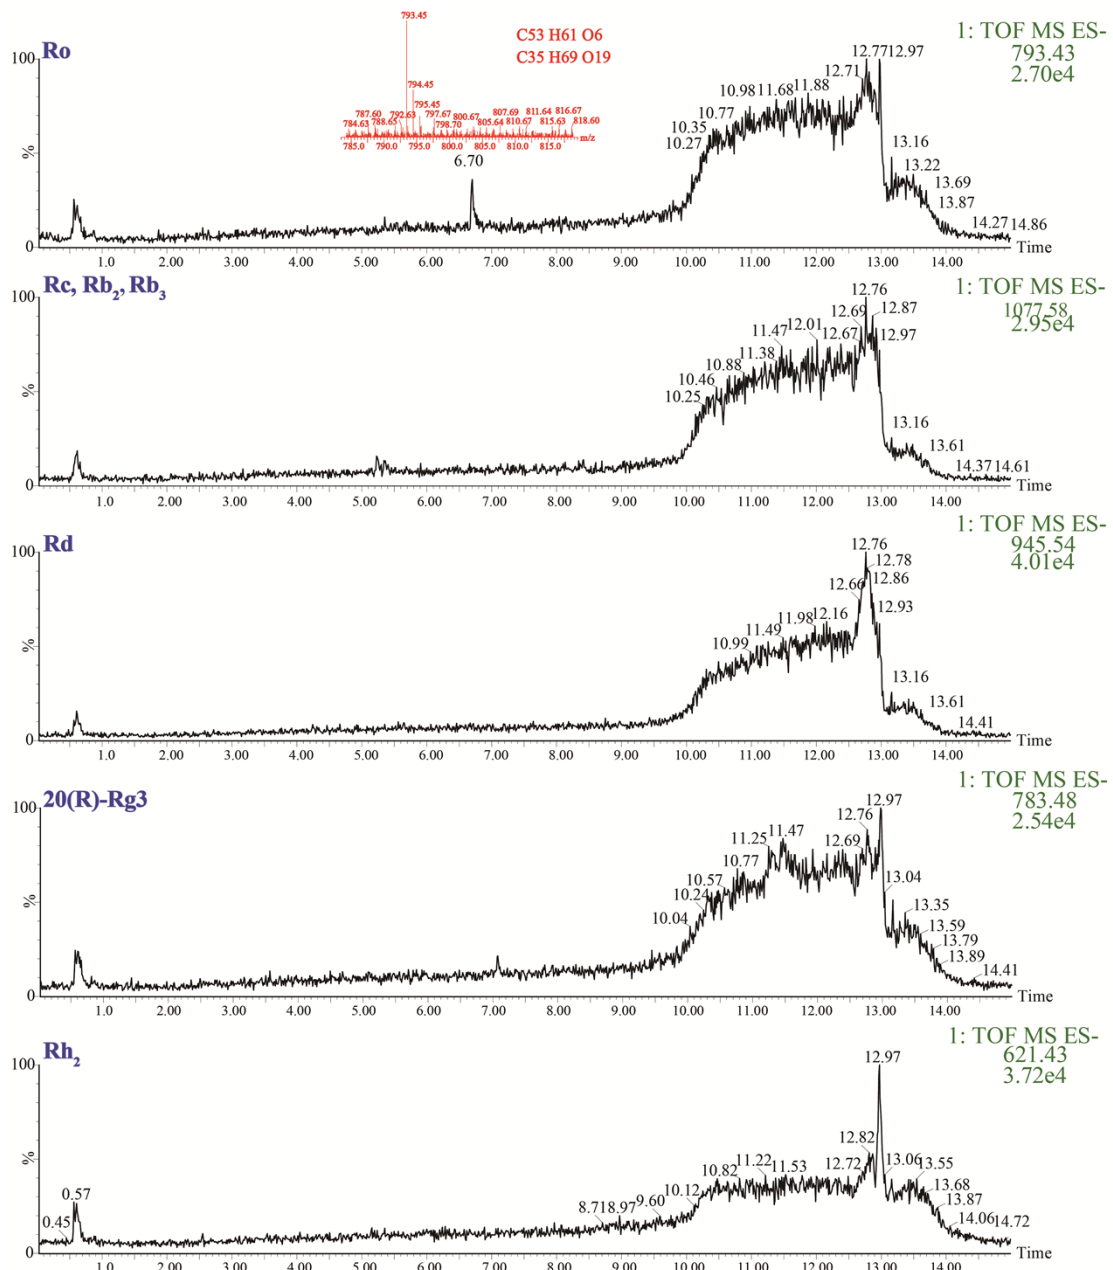

Fig. S1. Continued.
